# Supplementary material
Source: publisher figshare collection journal article supplement (https://rs.figshare.com/ndownloader/files/14083193)
Supplement: Supplementary file 1 [file 14083193]

Supplementary Table 4. Suhonen Jukka, Ilvonen Jaakko J., Nyman Tommi, and Sorvari Jouni. Brood parasitism in eusocial insects (Hymenoptera): role of host geographic range size and phylogeny. Philosophical Transactions B.

Geographic range sizes (GRS, measured as the number of 611 000 km2 grids occupied) of parasitized bumblebee species (Host GRS) and their closest unparasitized relatives (Potential host GRS).The probability of parasitism in hosts (Host %) and their closest unparasitized relatives (Potential host %) were calculated using logistic regression without taking phylogeny into account. Sector indicates the position of each pair in Figure 7.

| **Host species** | **Potential host species** | **Host GRS** | **Potential host GRS** | **Host %** | **Potential host %** | **Sector** |
| --- | --- | --- | --- | --- | --- | --- |
|  |  |  |  |  |  |  |
| *B. affinis* | *B. franklini* | 11 | 1 | 6.90 | 0.71 | C |
| *B. appositus* | *B. borealis* | 11 | 18 | 6.90 | 20.90 | C |
| *B. argillaceus* | *B. consobrinus* | 18 | 52 | 20.90 | 62.52 | A |
| *B. bifarius* | *B. vosnesenskii* | 18 | 7 | 20.90 | 3.03 | C |
| *B. bimaculatus* | *B. sylvicola* | 14 | 36 | 11.71 | 63.16 | A |
| *B. fervidus* | *B. mexicanus* | 27 | 7 | 46.39 | 3.03 | C |
| *B. flavifrons* | *B. vandykei* | 24 | 6 | 38.13 | 2.42 | C |
| *B. hortorum* | *B. portchinsky* | 54 | 4 | 59.79 | 1.51 | D |
| *B. humilis* | *B. deuteronymus* | 46 | 28 | 67.00 | 48.91 | D |
| *B. huntii* | *B. vosnesenskii* | 17 | 7 | 18.33 | 3.03 | C |
| *B. hypnorum* | *B. haematurus* | 63 | 8 | 39.43 | 3.77 | C |
| *B. impatiens* | *B. ephippiatus* | 17 | 10 | 18.33 | 5.69 | C |
| *B. jonellus* | *B. cingulatus* | 66 | 25 | 30.66 | 40.98 | C |
| *B. lapidarius* | *B. incertus* | 28 | 7 | 48.91 | 3.03 | C |
| *B. lapponicus* | *B. cinculatus* | 36 | 25 | 63.16 | 40.98 | D |
| *B. lucorum* | *B. cryptarum* | 39 | 52 | 65.81 | 62.52 | B |
| *B. monticola* | *B. haematurus* | 15 | 8 | 13.72 | 3.77 | C |
| *B. muscorum* | *B. veteranus* | 59 | 28 | 50.00 | 48.91 | C/D |
| *B. nevadensis* | *B. auricomus* | 17 | 14 | 18.33 | 11.71 | C |
| *B. occidentalis* | *B. frenklini* | 21 | 1 | 29.33 | 0.71 | C |
| *B. pascuorum* | *B. schrenki* | 62 | 40 | 42.25 | 66.4 | A |
| *B. pensylvanicus* | *B. medius* | 29 | 5 | 51.27 | 1.92 | D |
| *B. pomorum* | *B. mesomelas* | 19 | 10 | 23.61 | 5.69 | C |
| *B. pratorum* | *B. brodmannicus* | 38 | 5 | 65.08 | 1.92 | D |
| *B. ruderarius* | *B. veteranus* | 30 | 28 | 53.47 | 48.91 | D |
| *B. ruderatus* | *B. gerstaeckeri* | 19 | 6 | 23.61 | 2.42 | C |
| *B. rufocinctus* | *B. fraternus* | 26 | 13 | 43.75 | 9.91 | C |
| *B. sichelii* | *B. incertus* | 44 | 7 | 67.35 | 3.03 | D |
| *B. soroeensis* | *B. veteranus* | 40 | 28 | 66.40 | 48.91 | D |
| *B. sylvarum* | *B. veteranus* | 27 | 28 | 46.39 | 48.91 | D |
| *B. ternarius* | *B. vosnesenskii* | 19 | 7 | 23.61 | 3.03 | C |
| *B. terrestris* | *B. cryptarum* | 43 | 52 | 67.32 | 62.52 | B |
| *B. terricola* | *B. franklini* | 28 | 1 | 48.91 | 0.71 | C |
| *B. vagans* | *B. centralis* | 24 | 19 | 38.13 | 23.61 | C |
